# Supplementary material
Source: Copernicus journal article supplement (doi:10.5194/egusphere-2026-2774)
Supplement: Supplementary file 1 [file SupplementMaterial.pdf › SupplementMaterial.pdf]

# **Supplement of The marine and coastal hazards of Mediterranean cyclones**

Sara Pavan<sup>1</sup>

<sup>1</sup>CNR - National Research Council of Italy, ISMAR - Institute of Marine Sciences, Venice, Italy

**Correspondence:** Sara Pavan (sara.pavan@cnr.it)

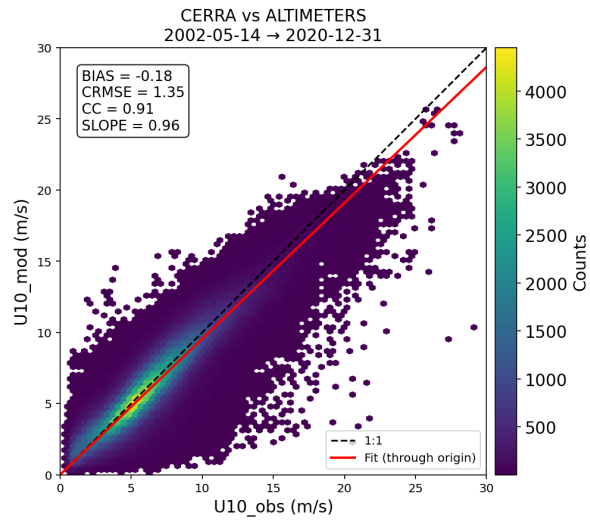

(a)

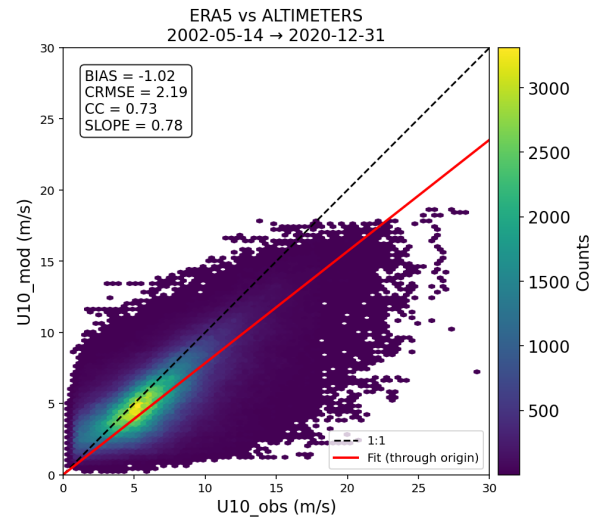

(b)

**Figure S1.** Scatter plot and statistics for wind data: comparison between CERRA and satellite data (a), comparison between ERA5 and satellite data (b).

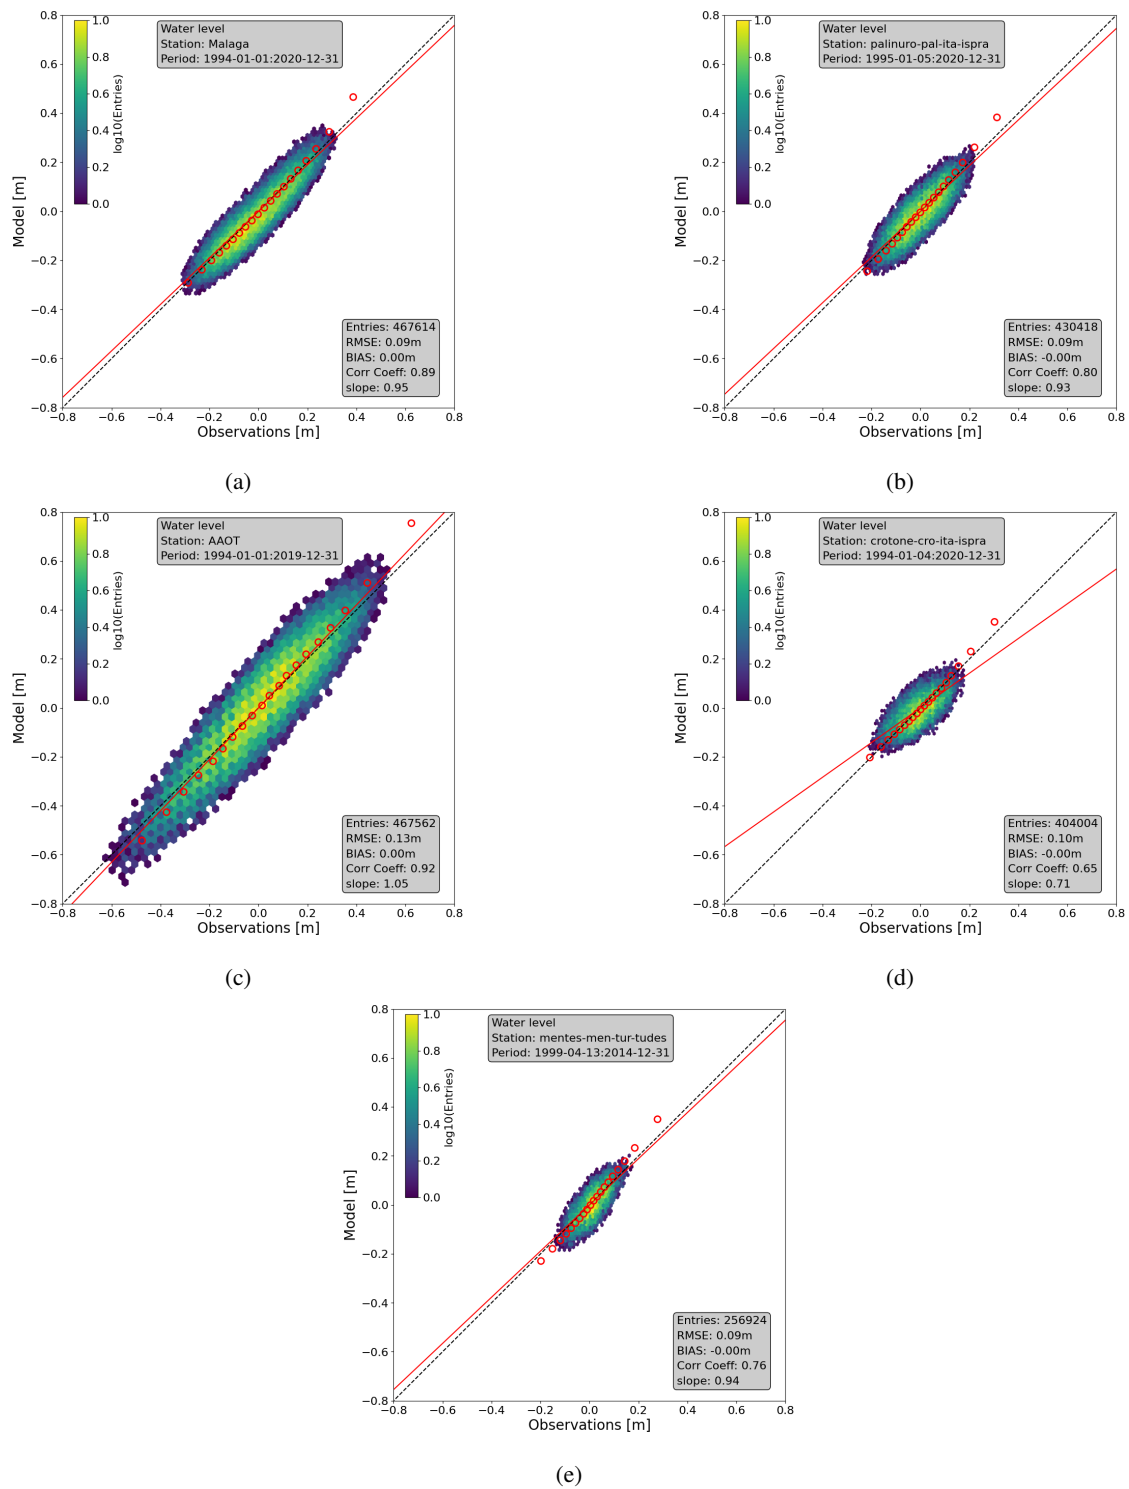

**Figure S2.** Scatter plot and statistics of the comparison between simulated sea levels and in-situ observations at different stations: Malaga (a), Palinuro (b), AAOT (c), Crotona (d), Mentes (e).

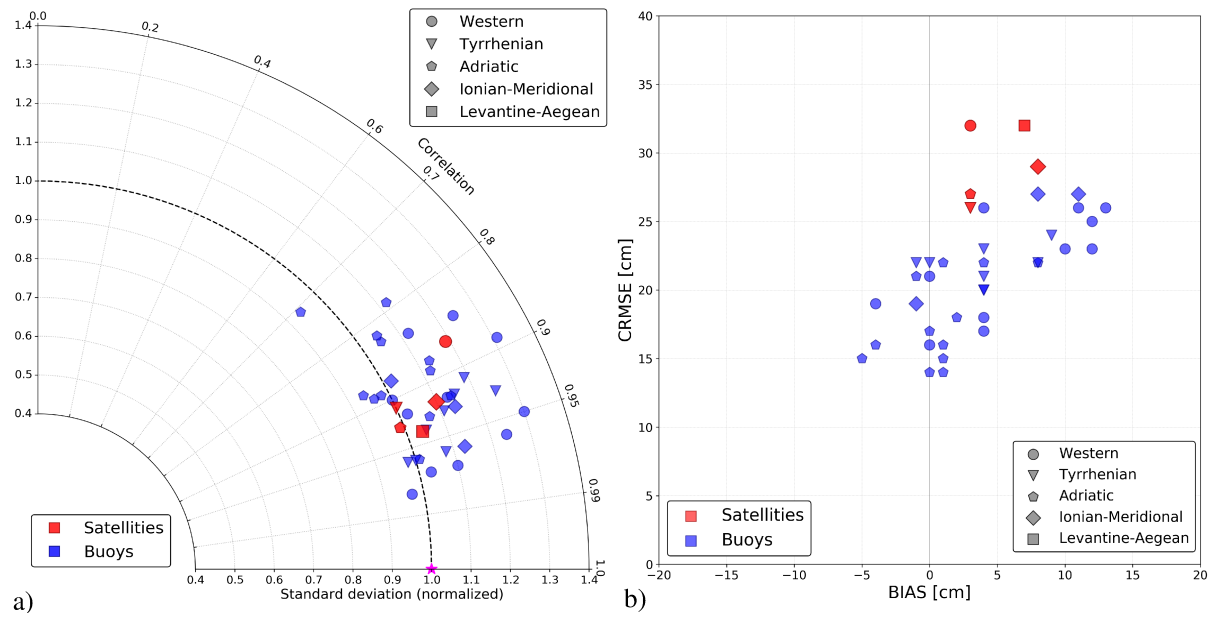

**Figure S3.** Normalized Taylor diagram (a) and bias diagram (b) displaying the performance of the simulated  $H_s$  against buoys and satellite data. The purple star in the Taylor diagram indicates the perfect agreement.

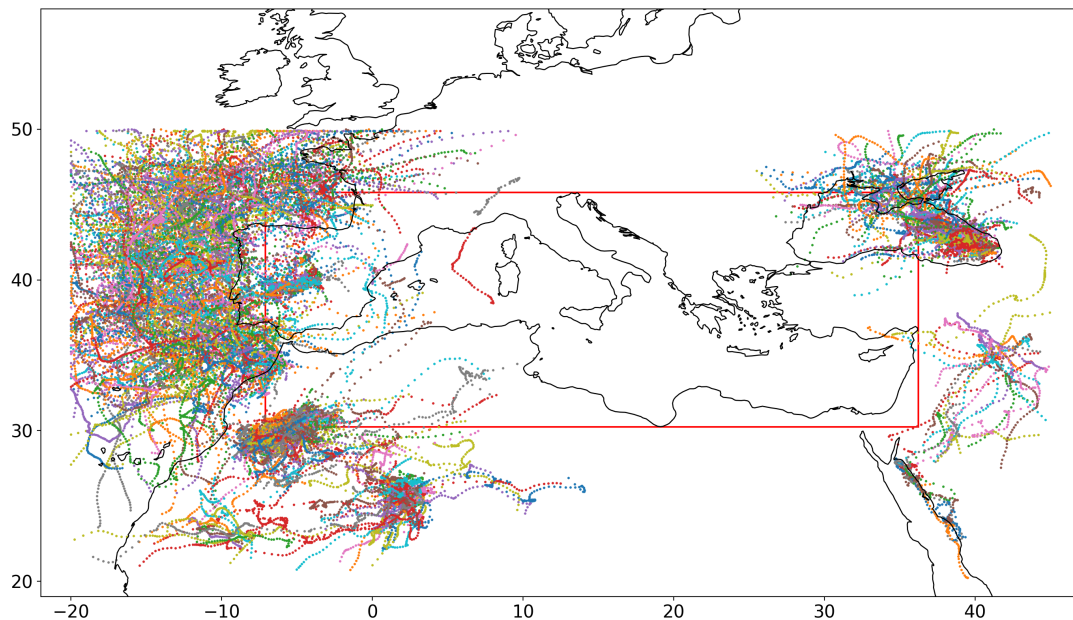

(a)

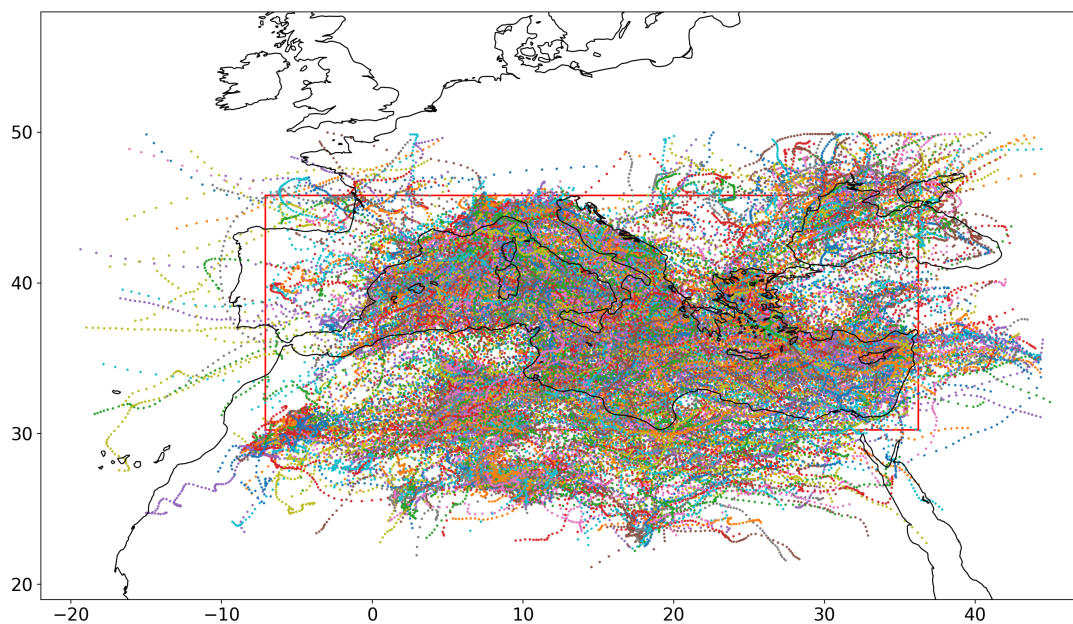

(b)

**Figure S4.** Cyclones tracks corresponding to the first mode (a) and to the second mode (b).
